# Supplementary material for: Synthesis and Pharmacological Evaluation of Novel Pleuromutilin Derivatives with Substituted Benzimidazole Moieties
Source: MDPI journal article supplement (doi:10.3390/molecules21111488), 2016-11-08

## Xin Ai , Xiuying Pu, Yunpeng Yi, Yu Liu, Shuijin Xu, Jianping Liang and Ruofeng Shang

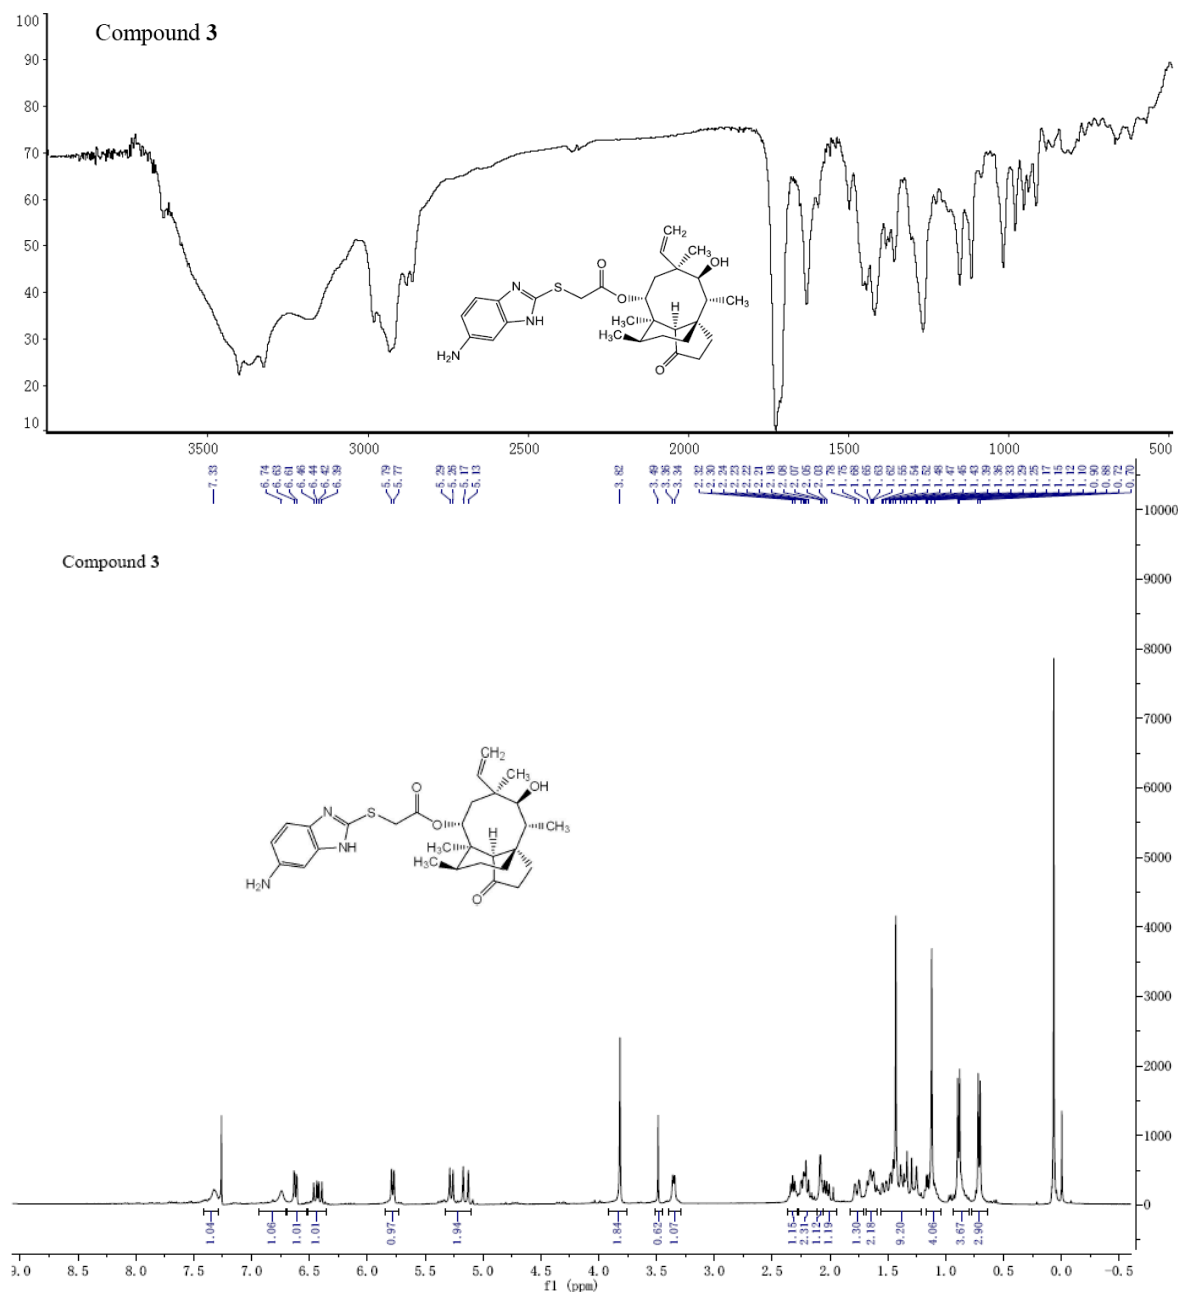

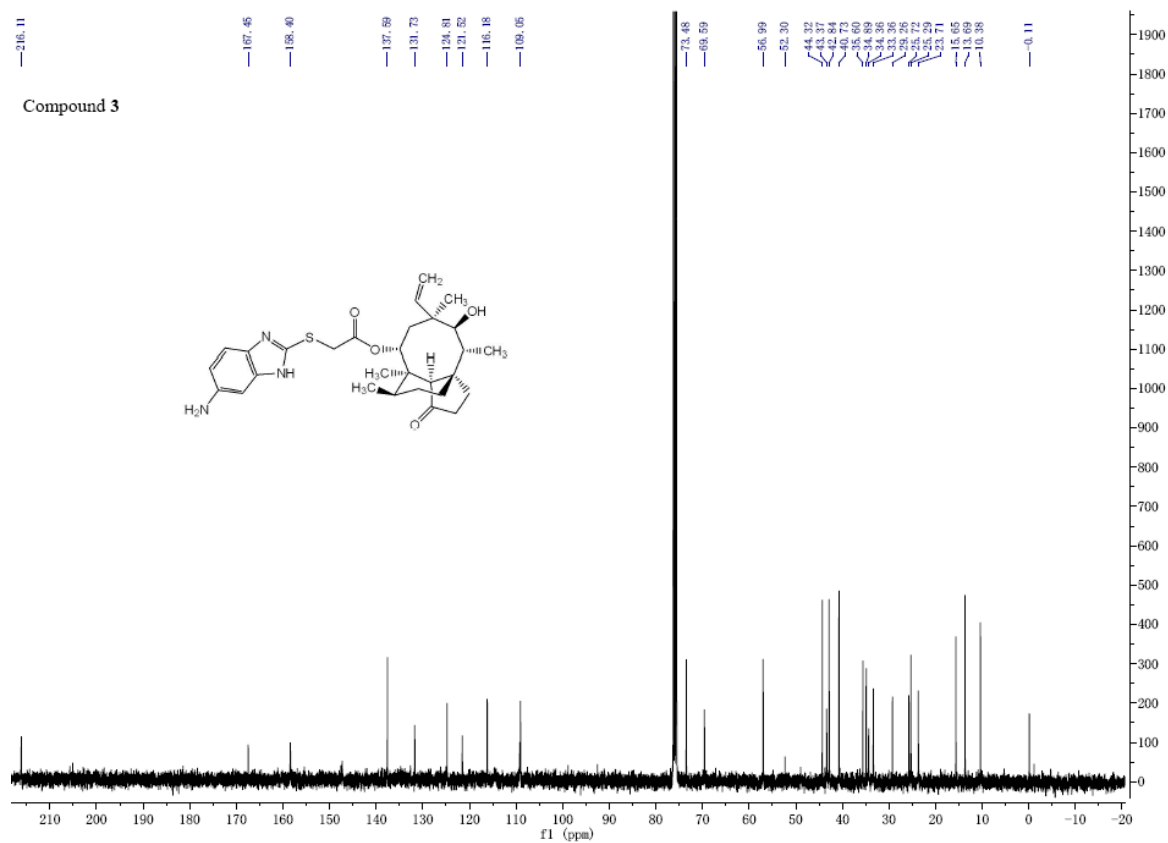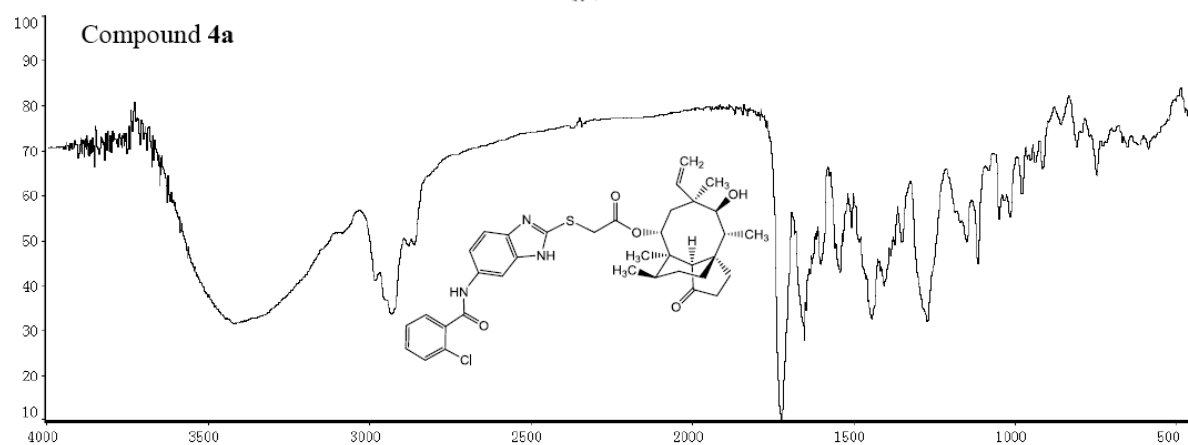

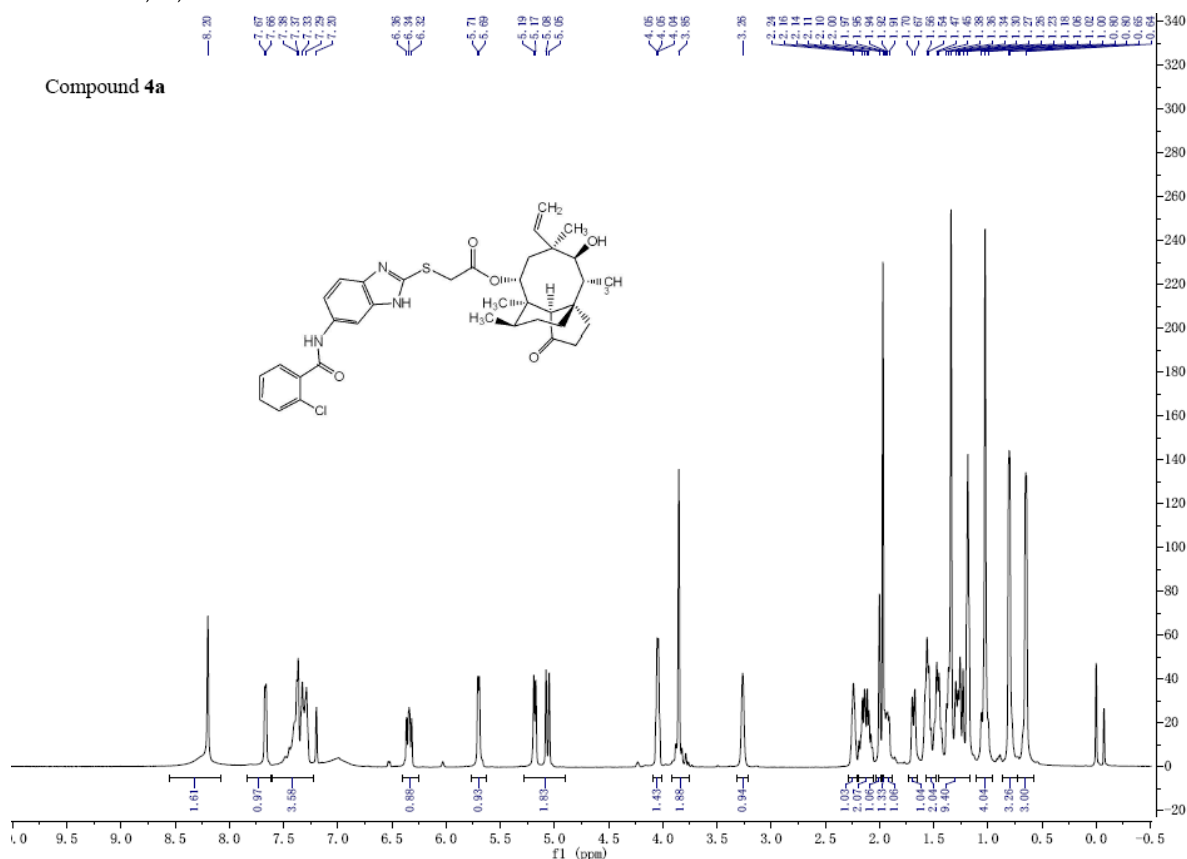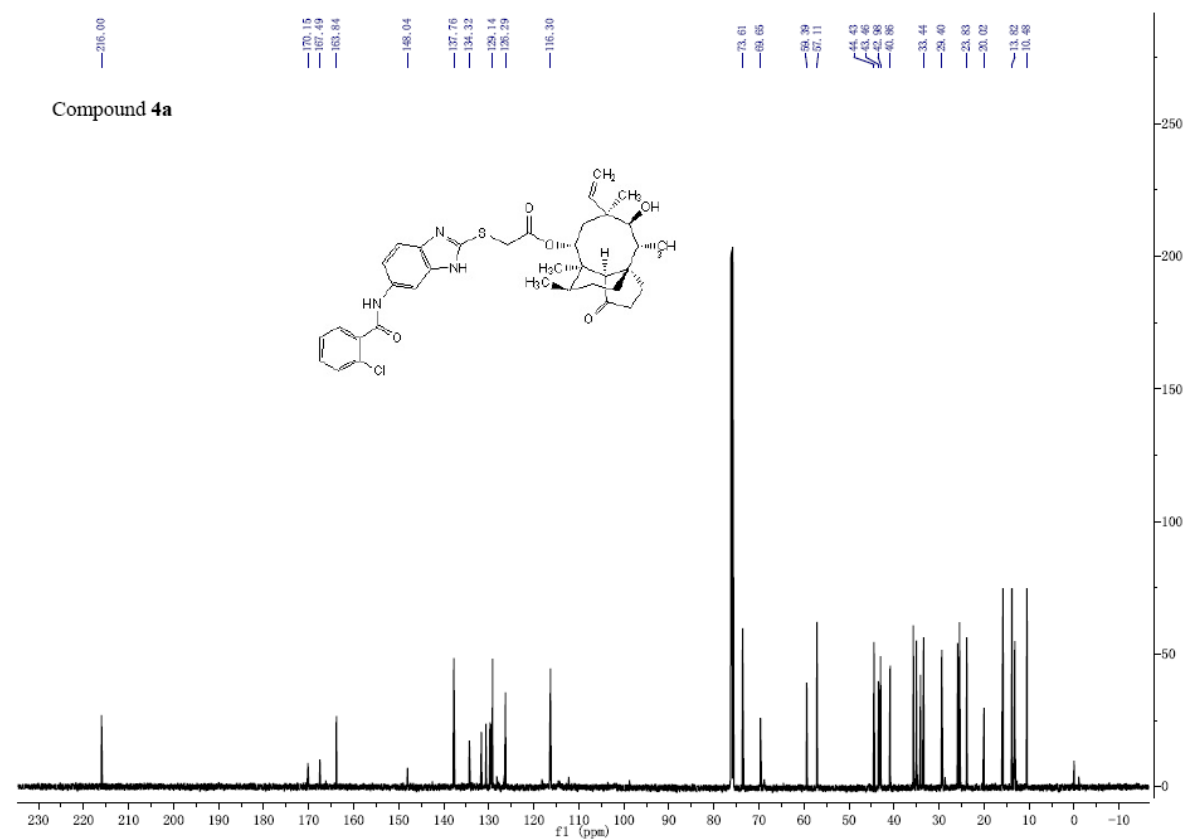

Compound 4b

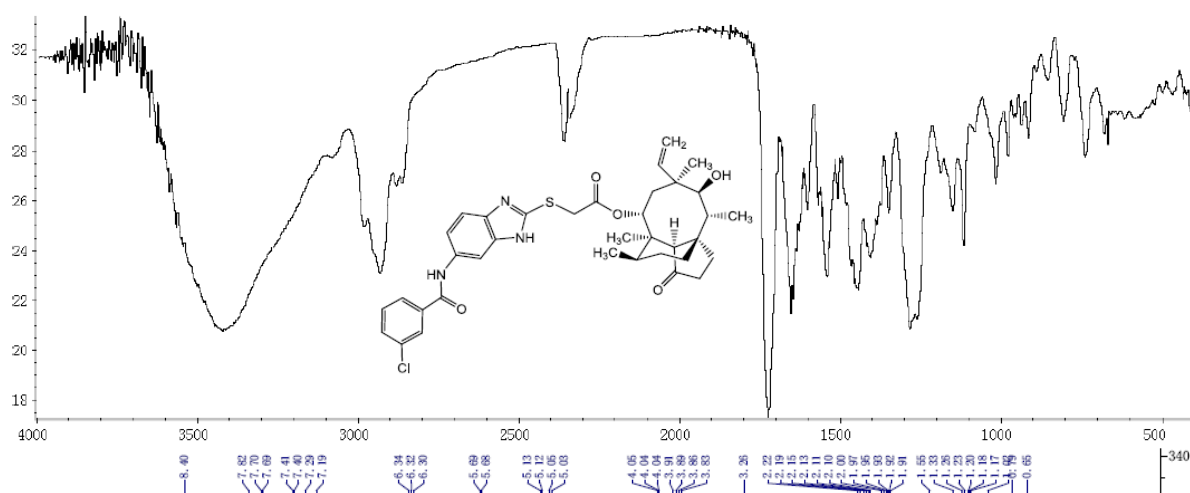

Compound 4b

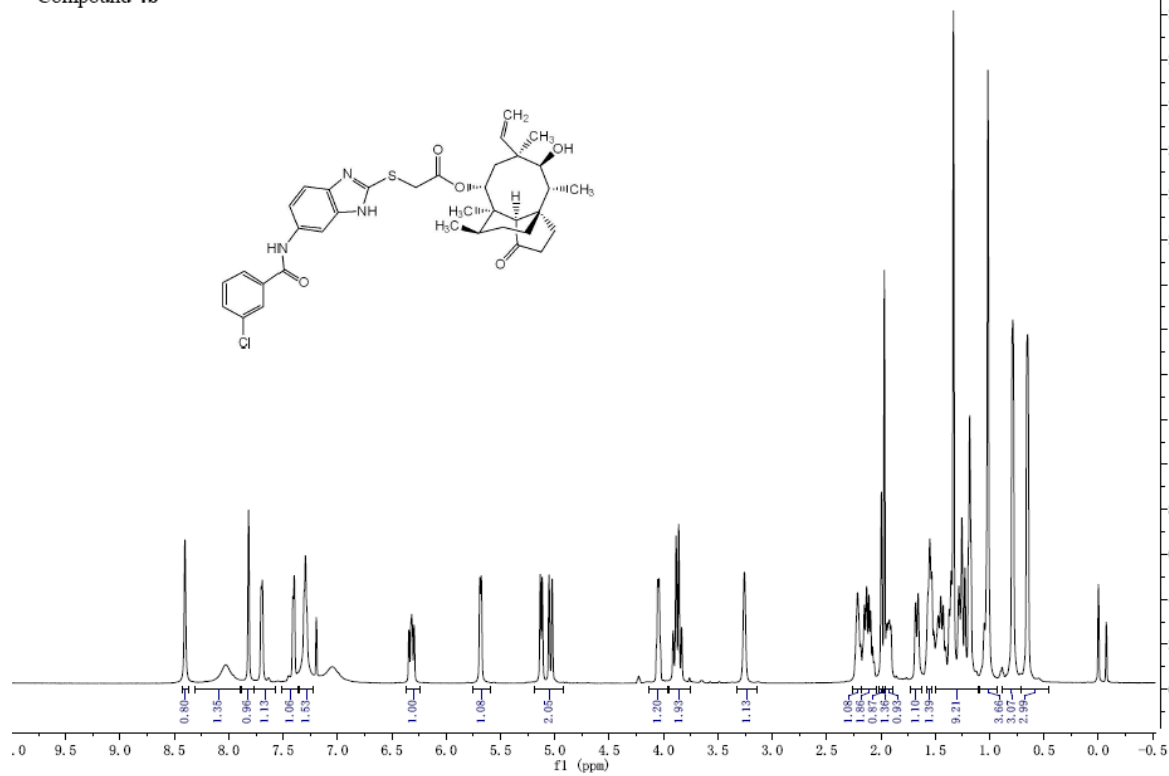

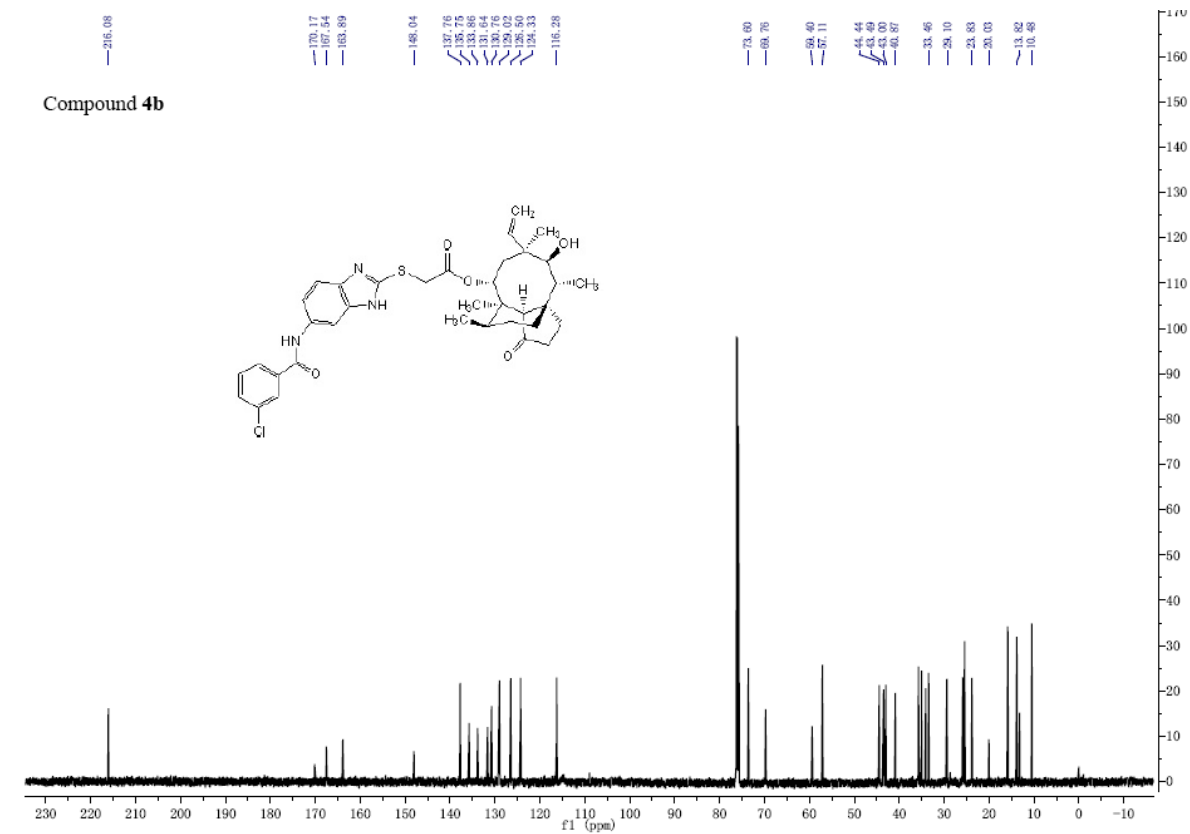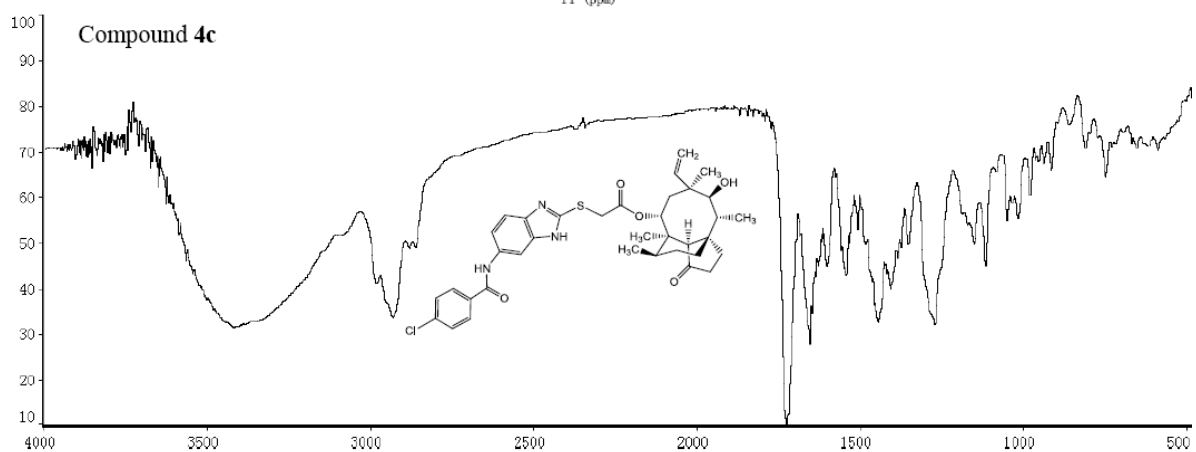

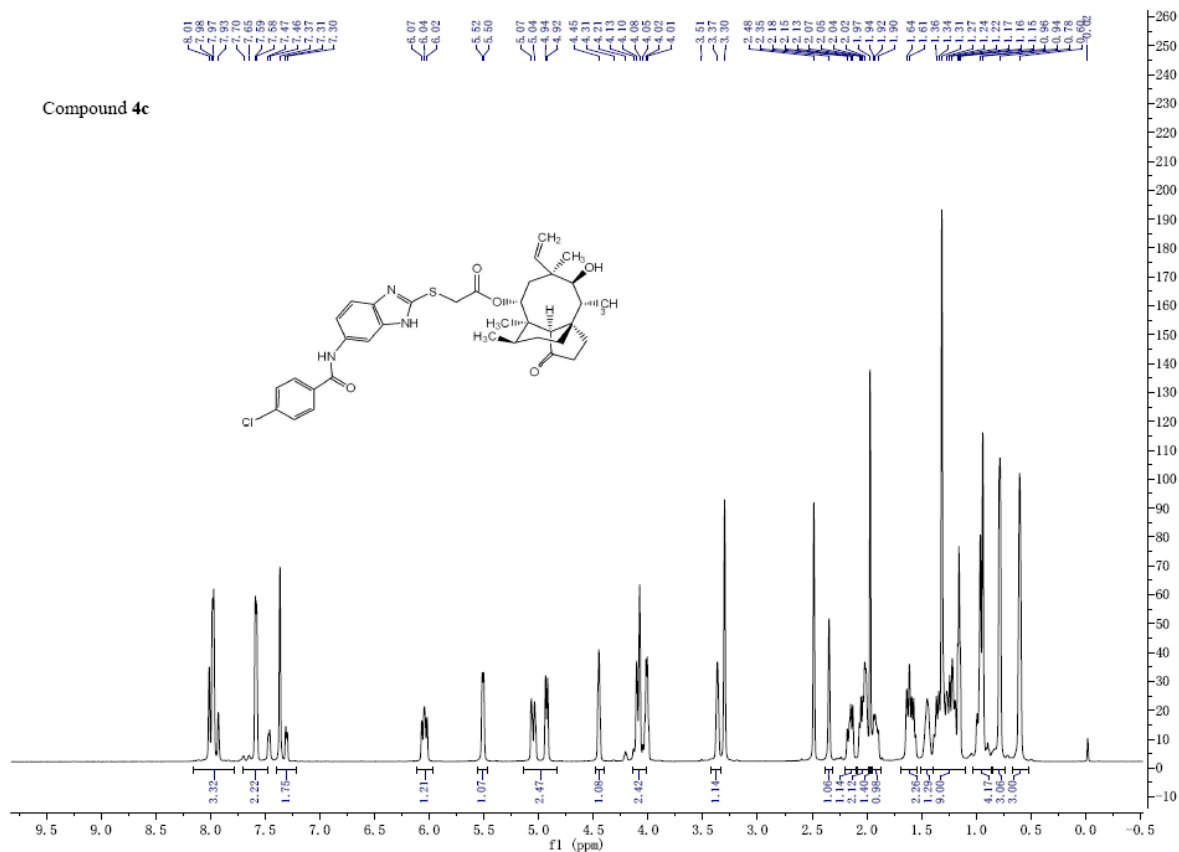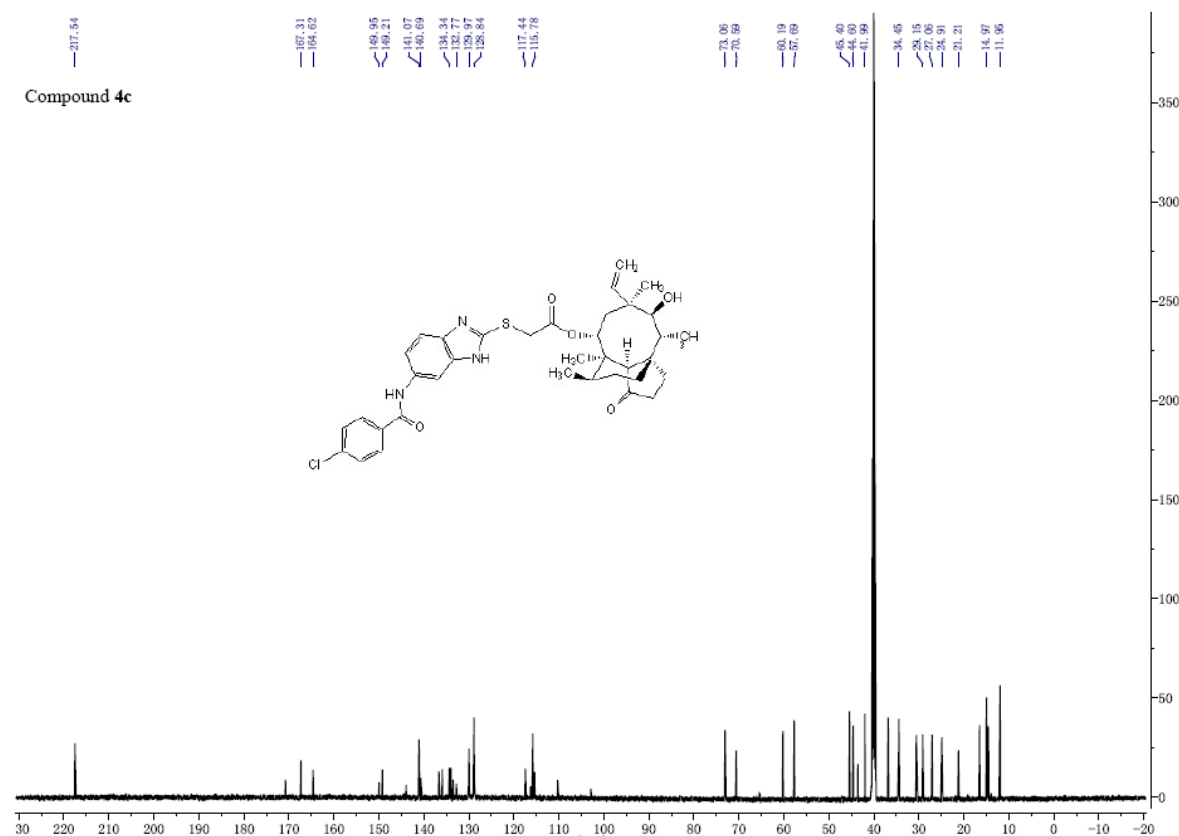

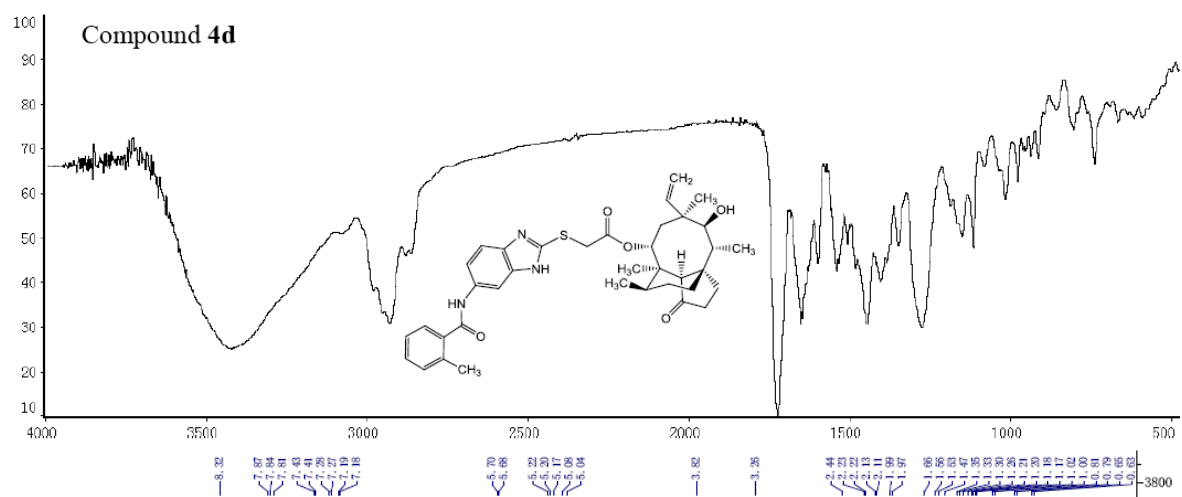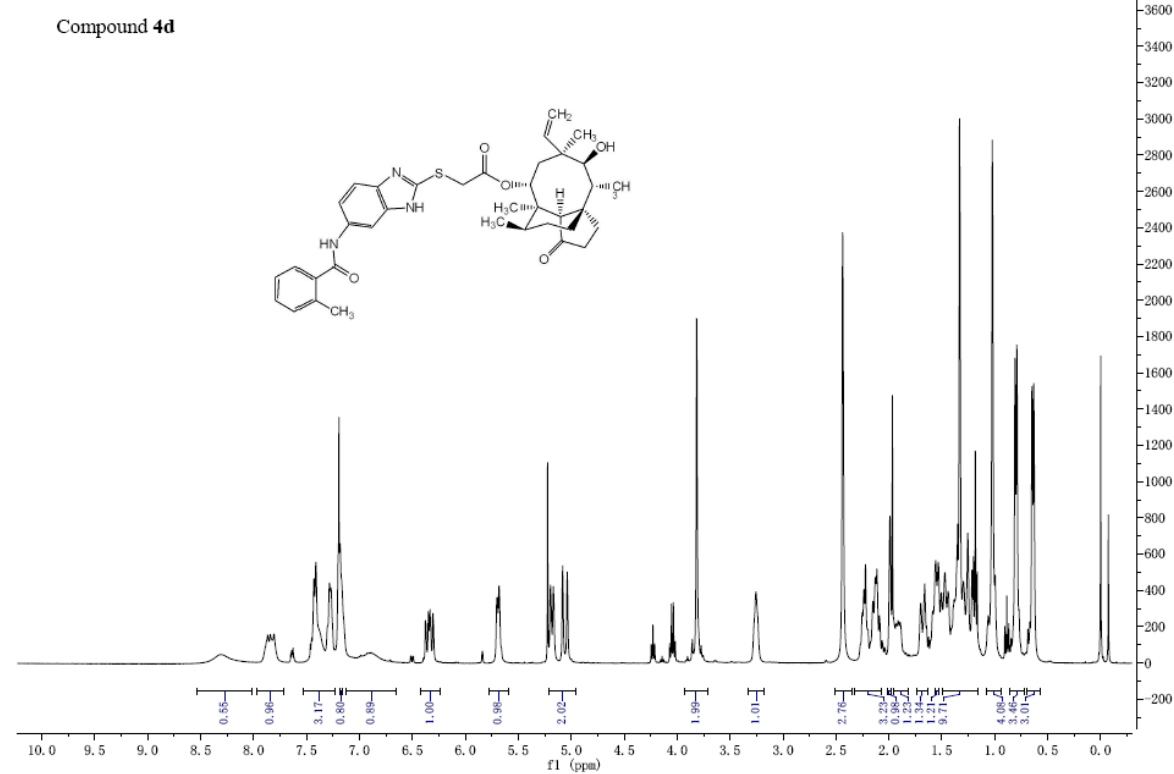

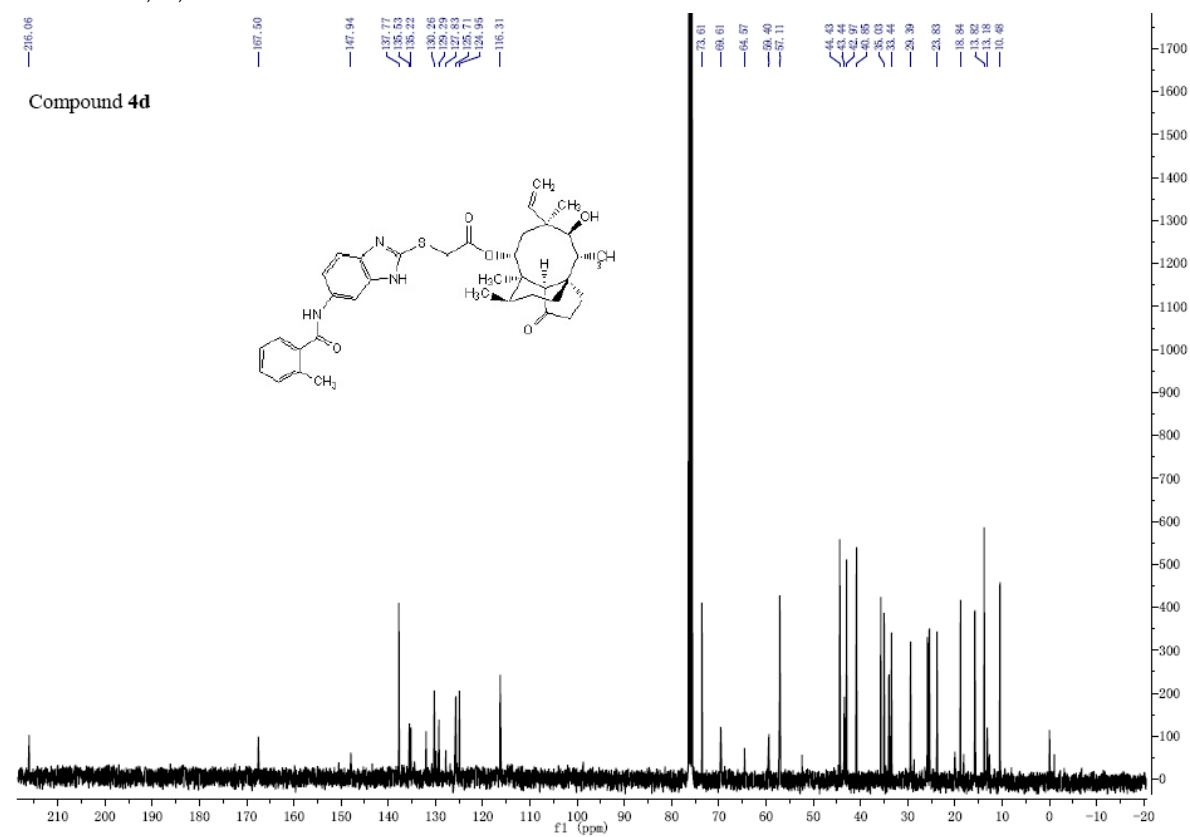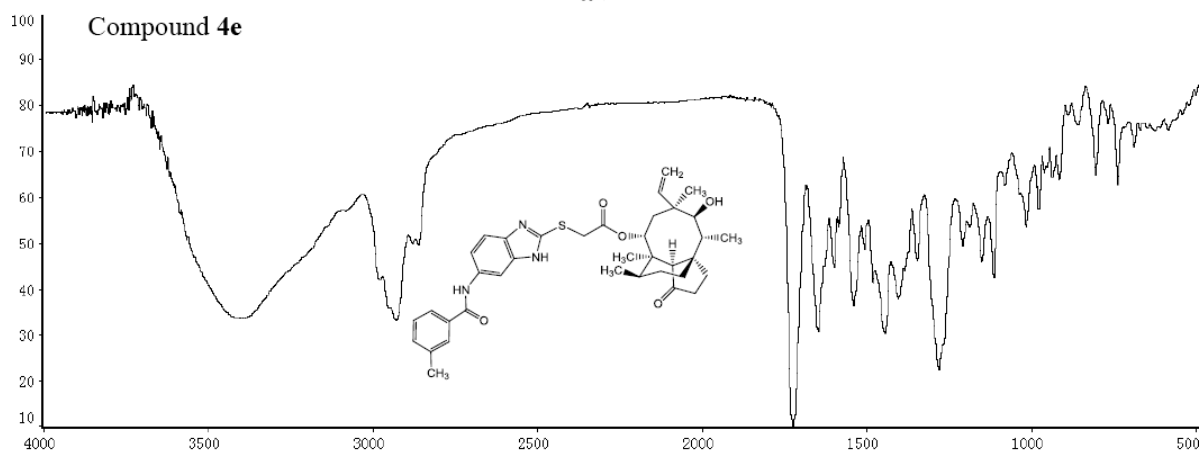



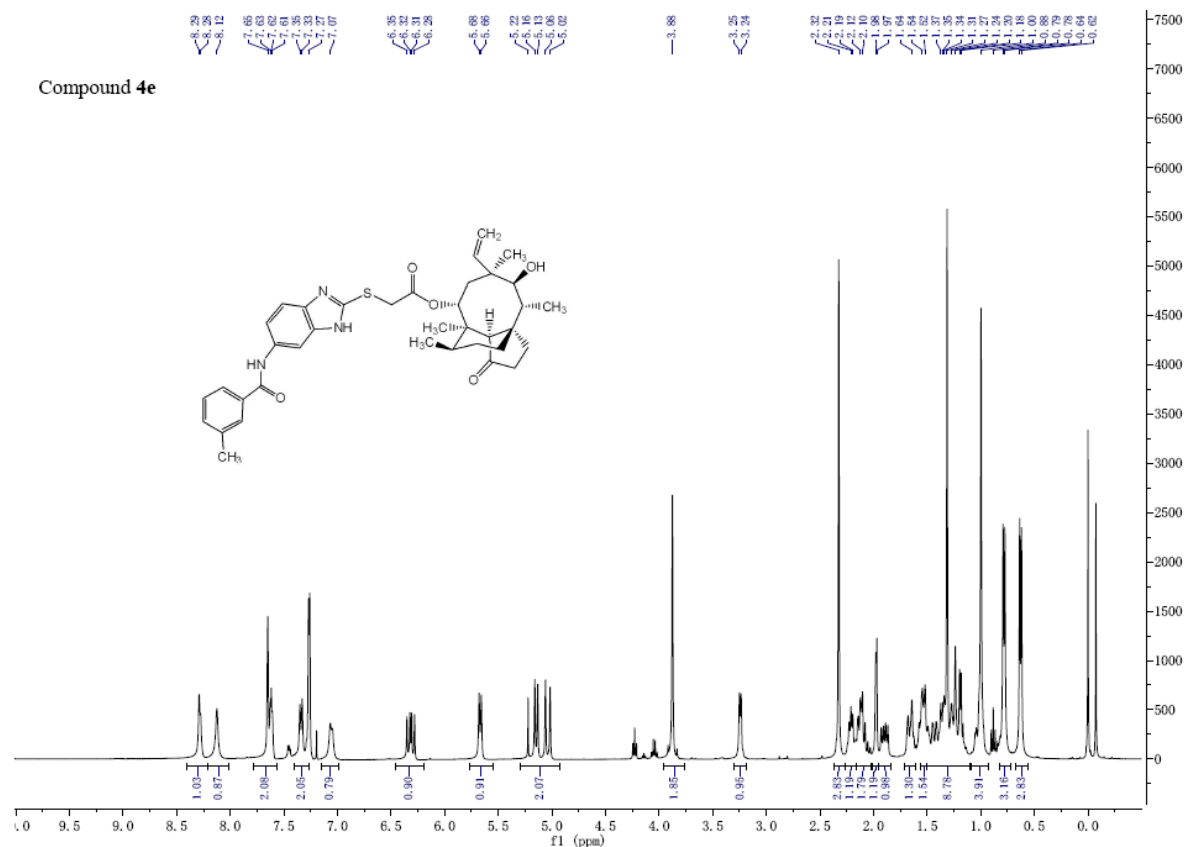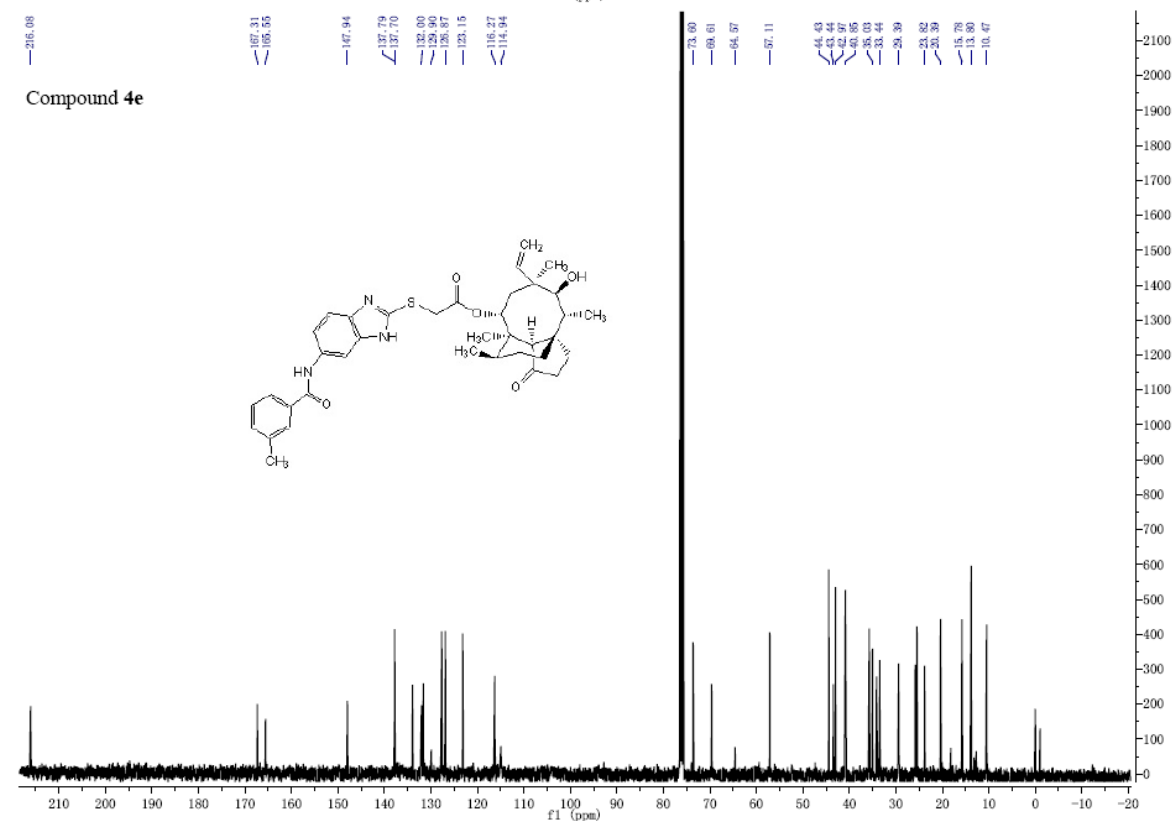

Compound 4f

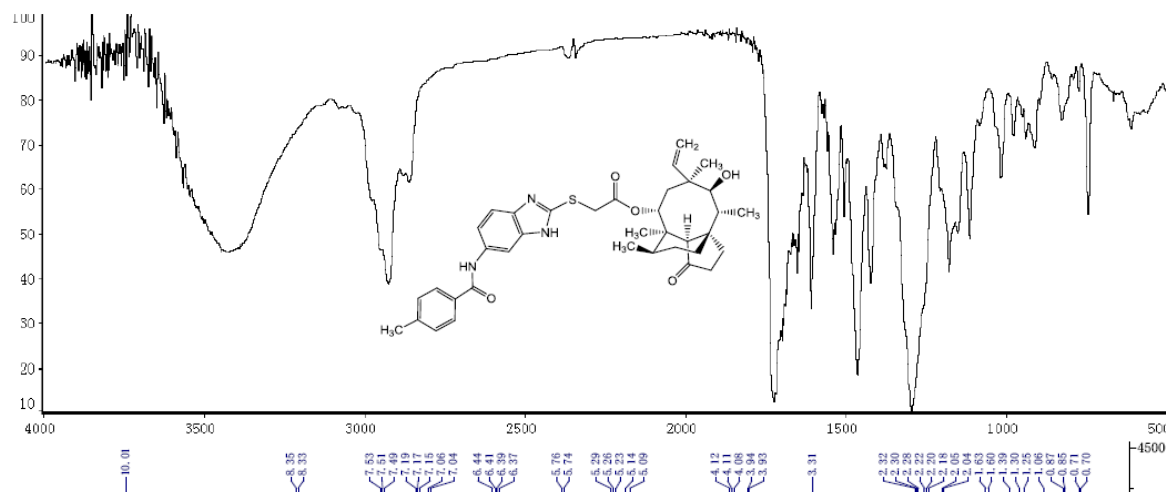

Compound 4f

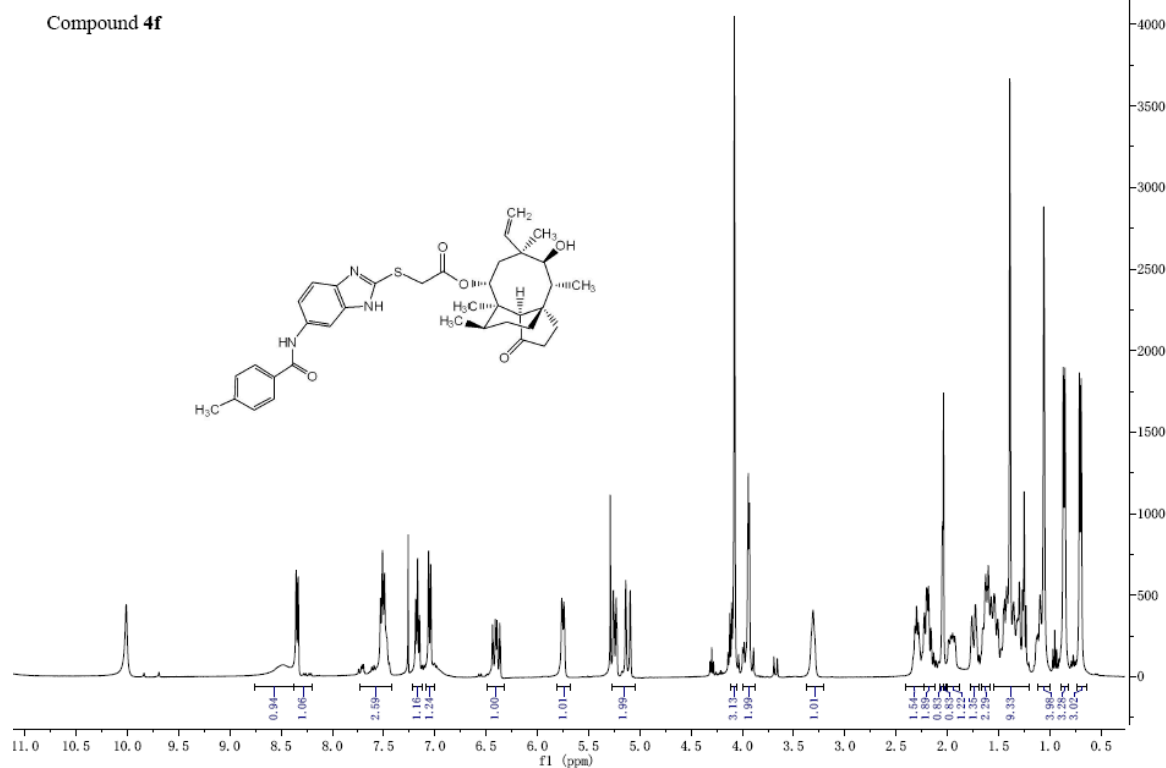

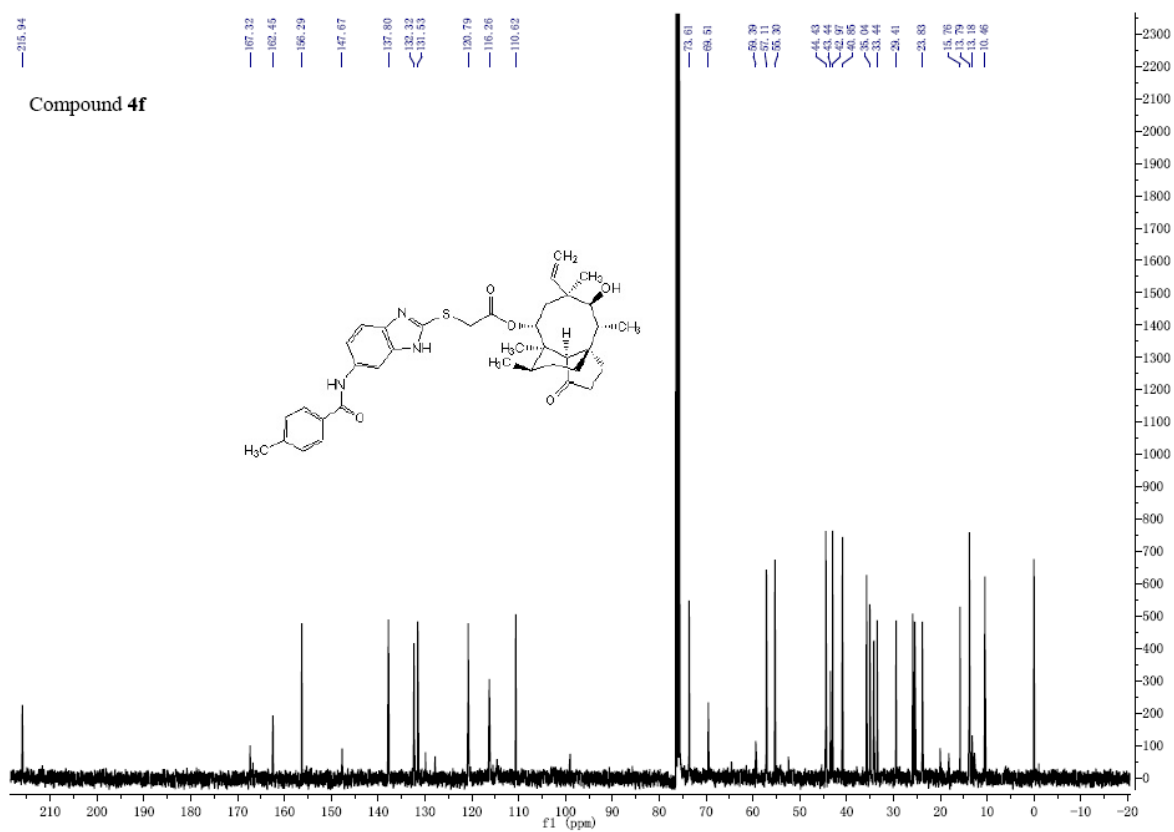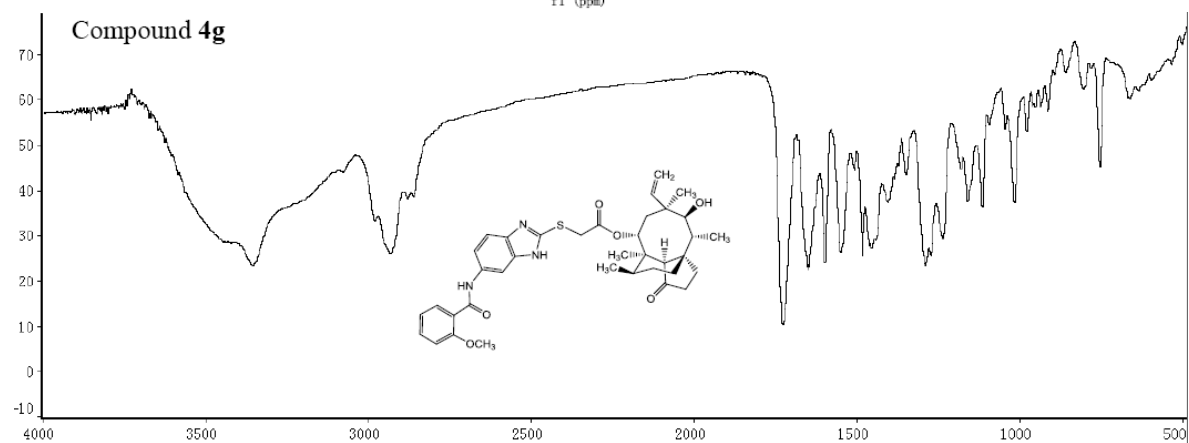



Compound 4h

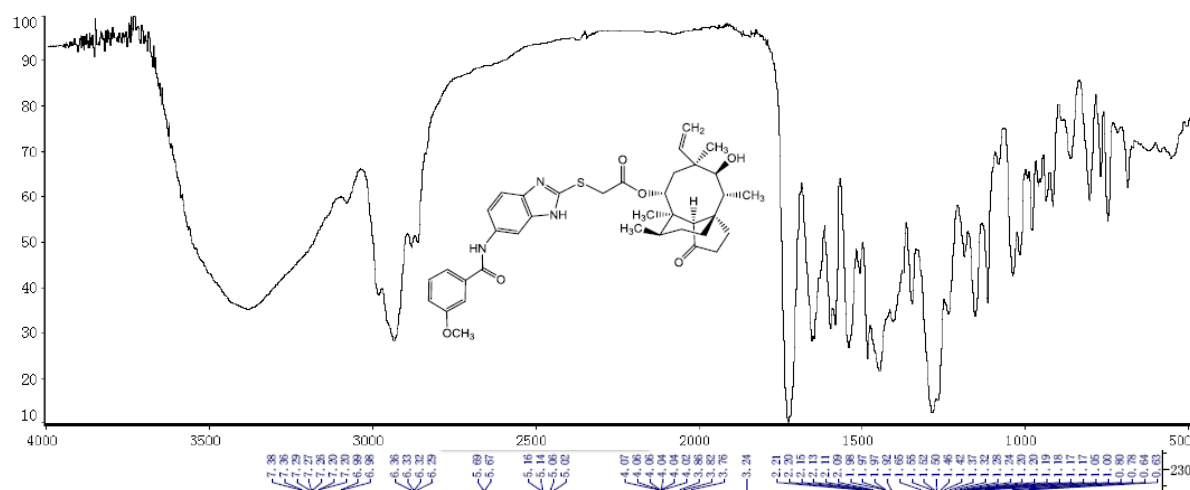

Compound 4h

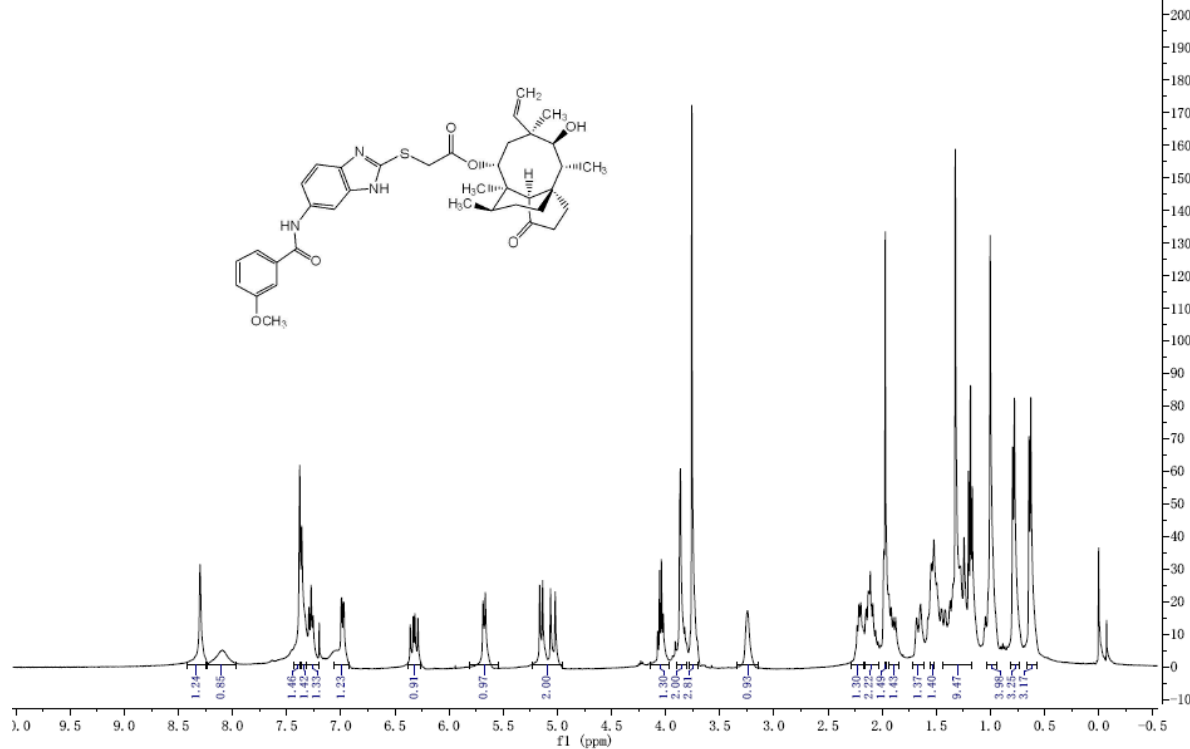

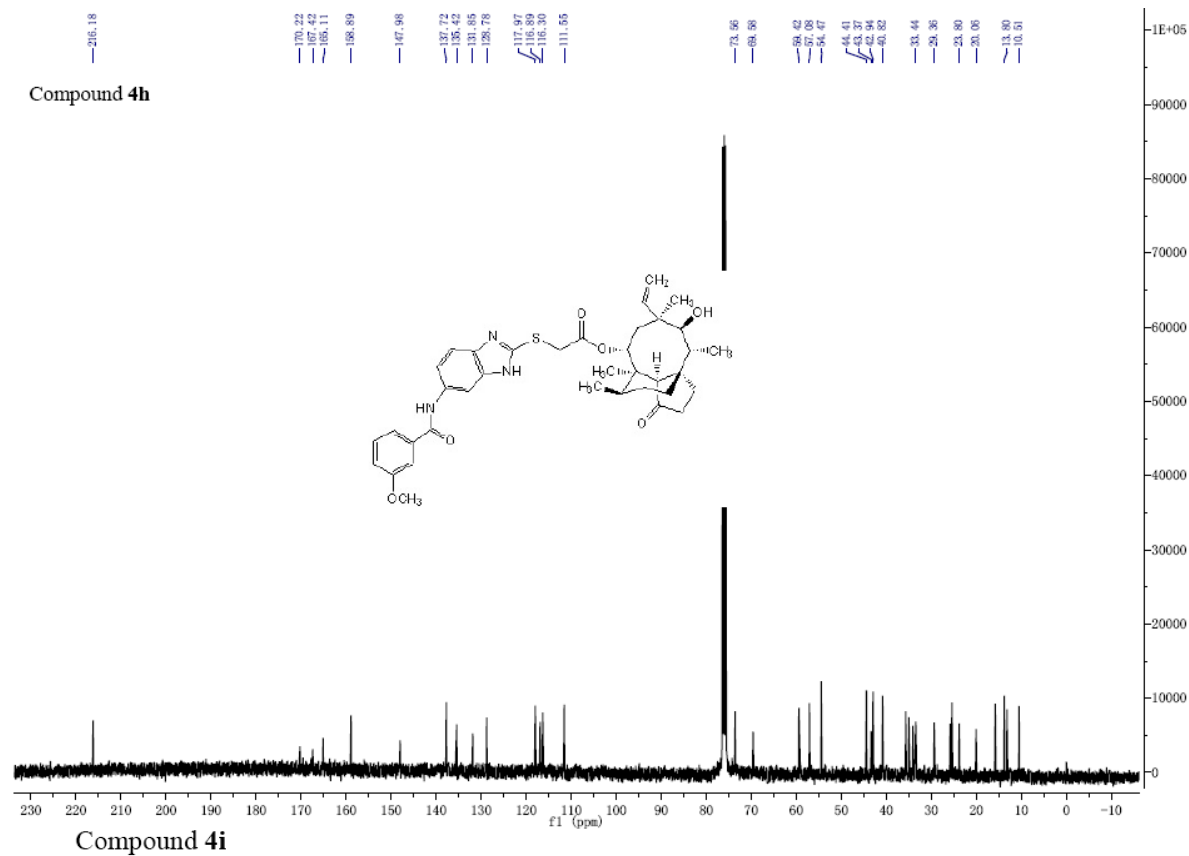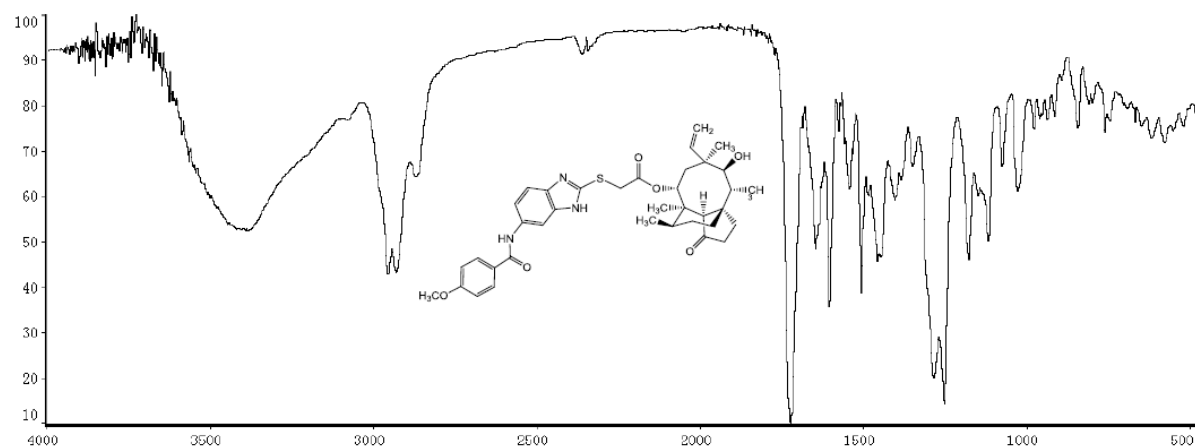

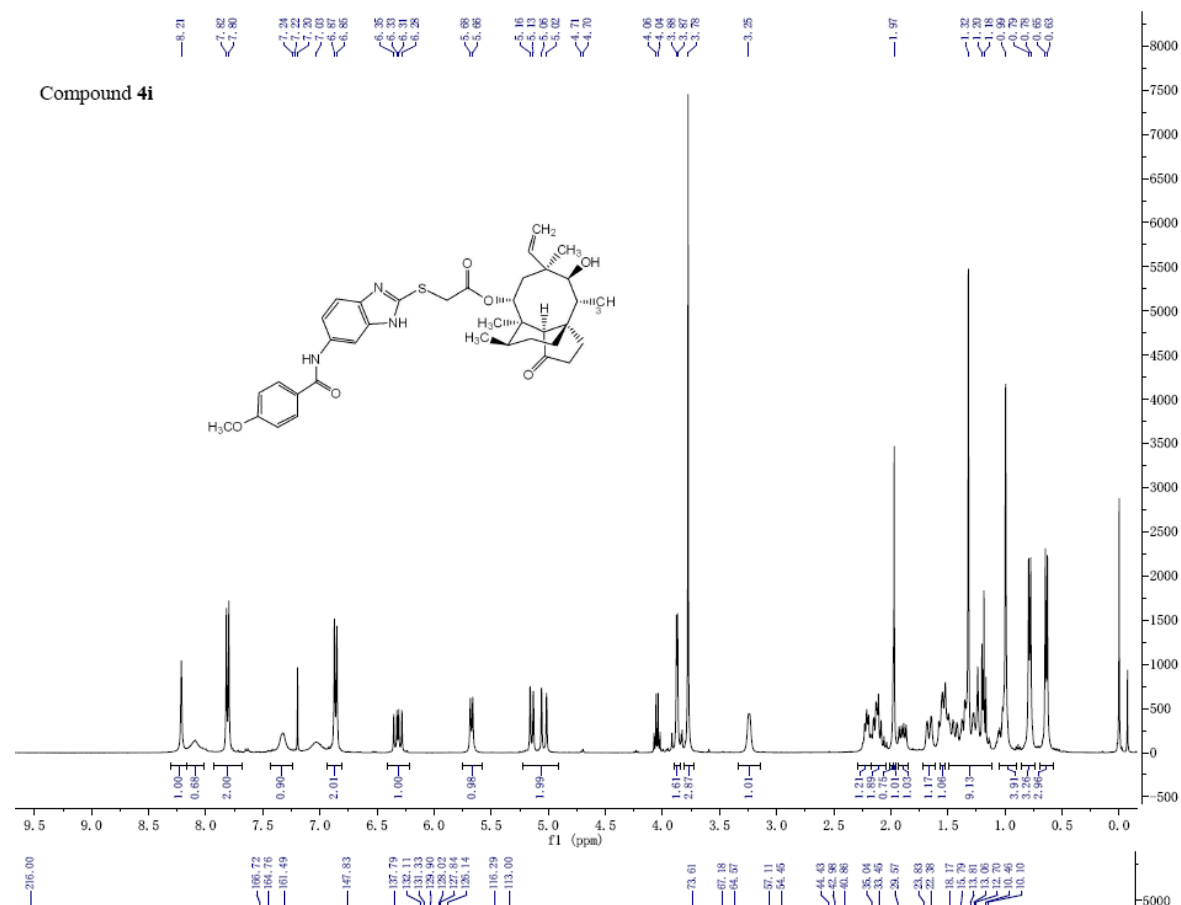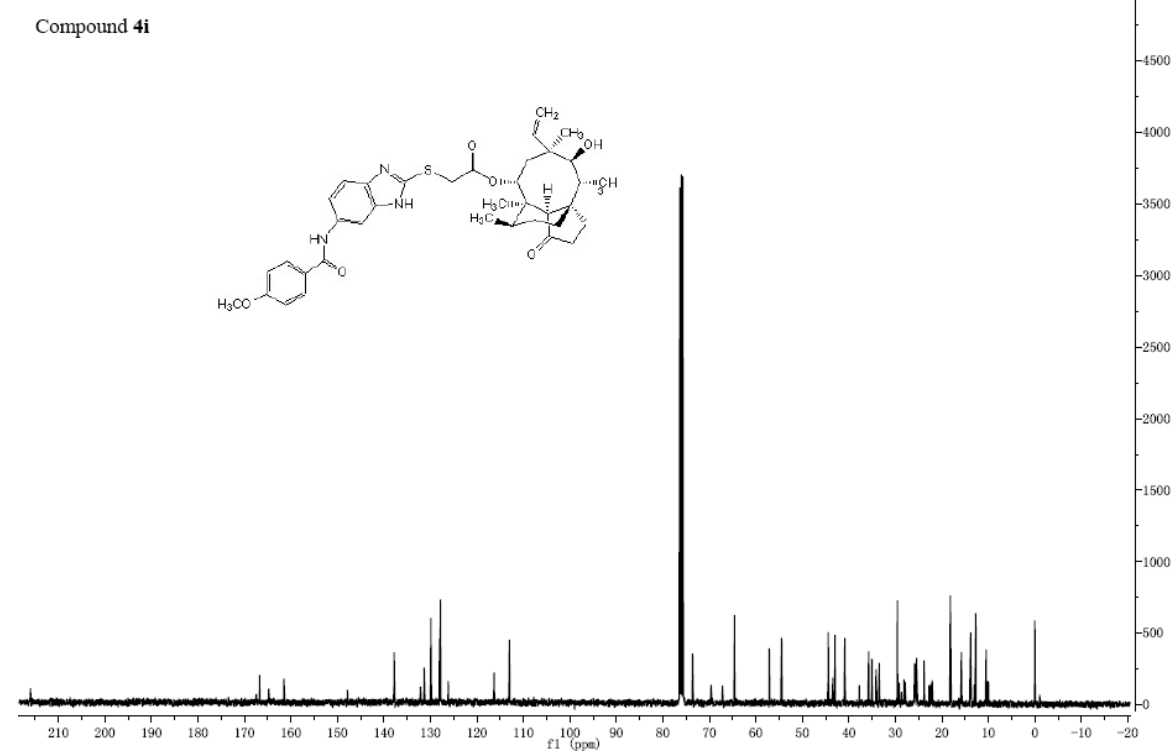

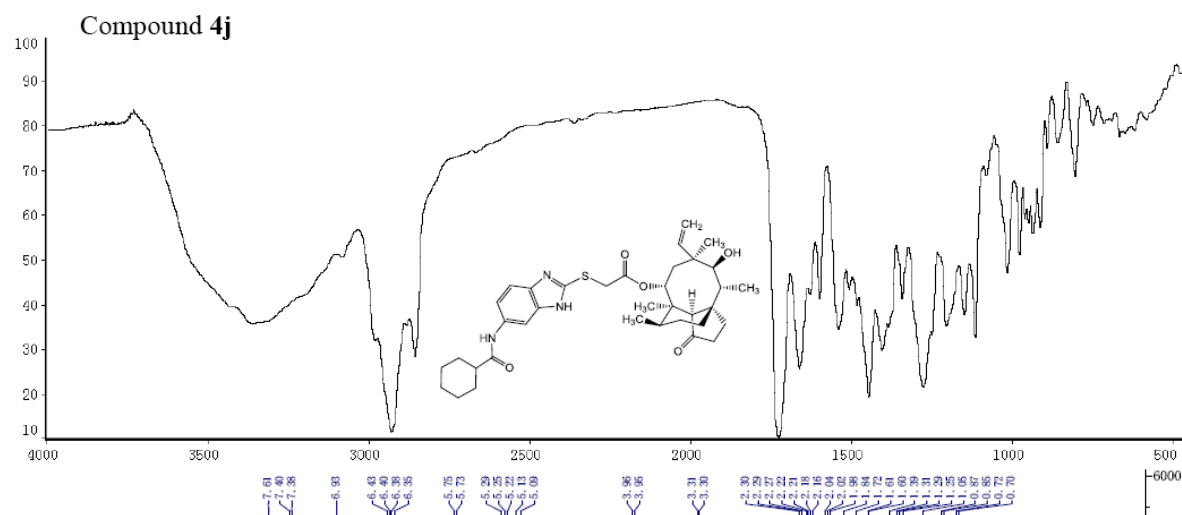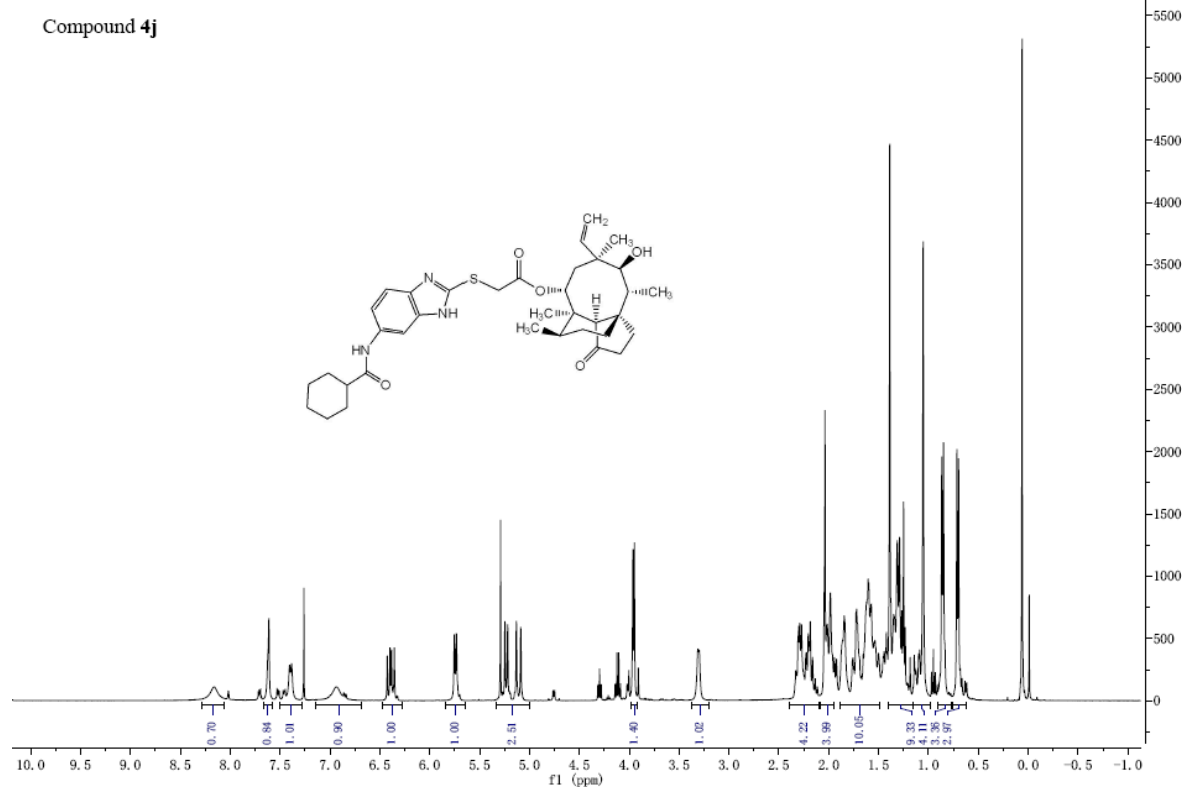



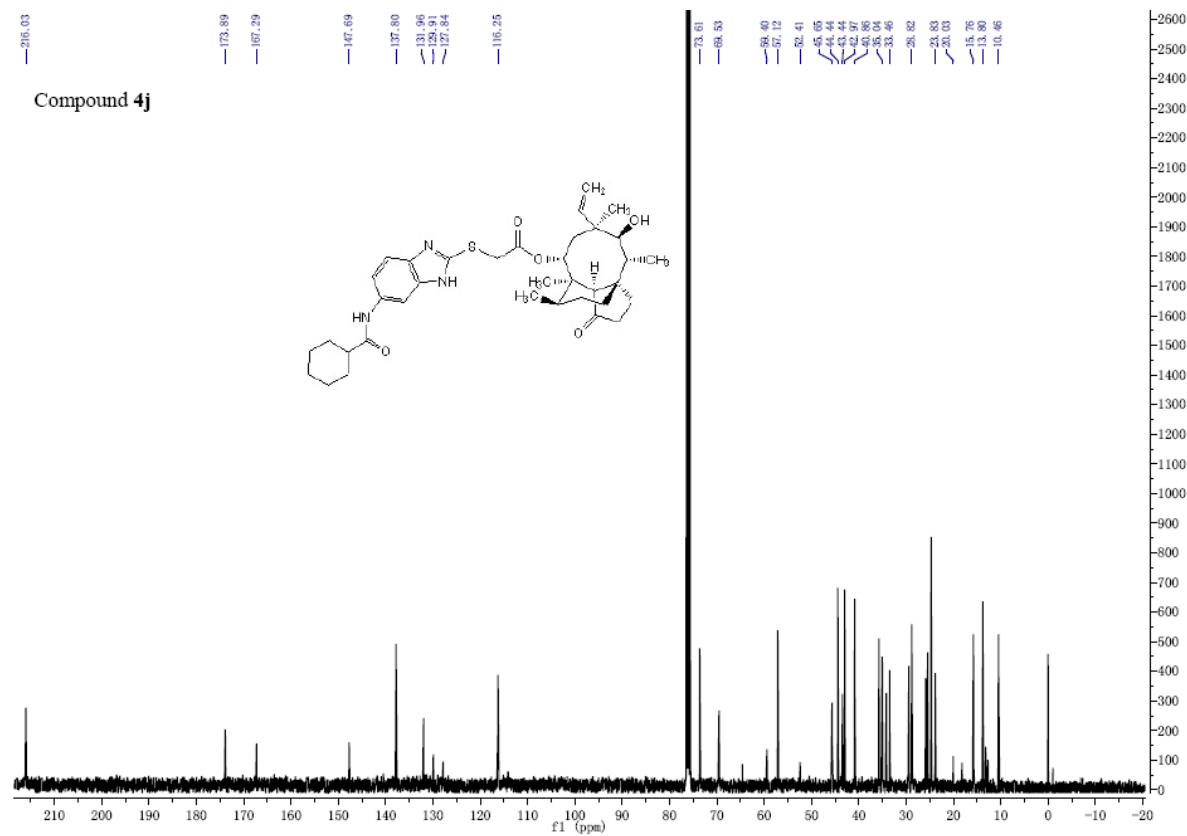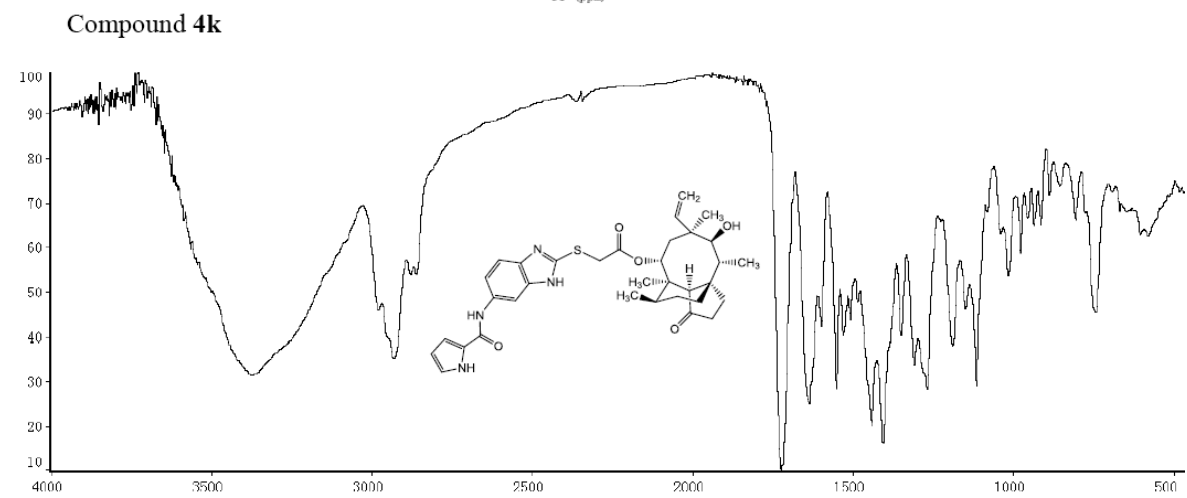

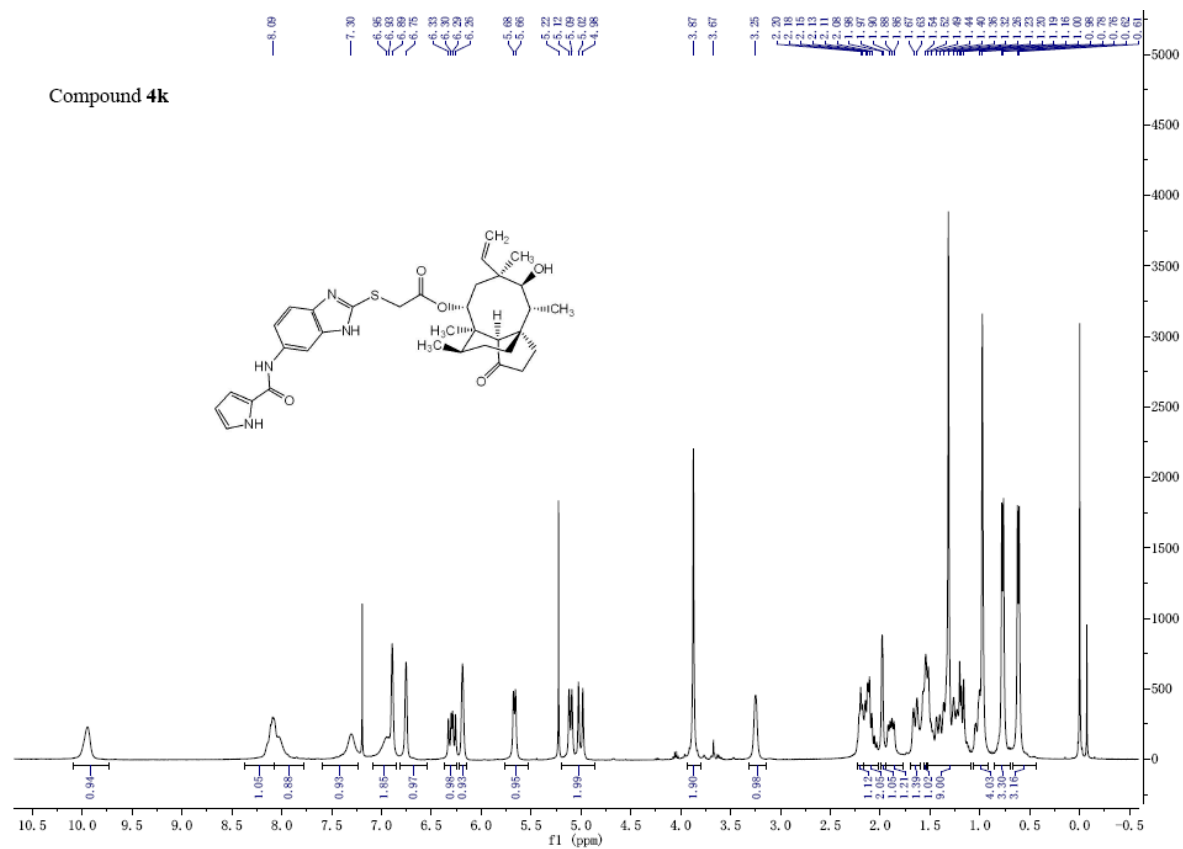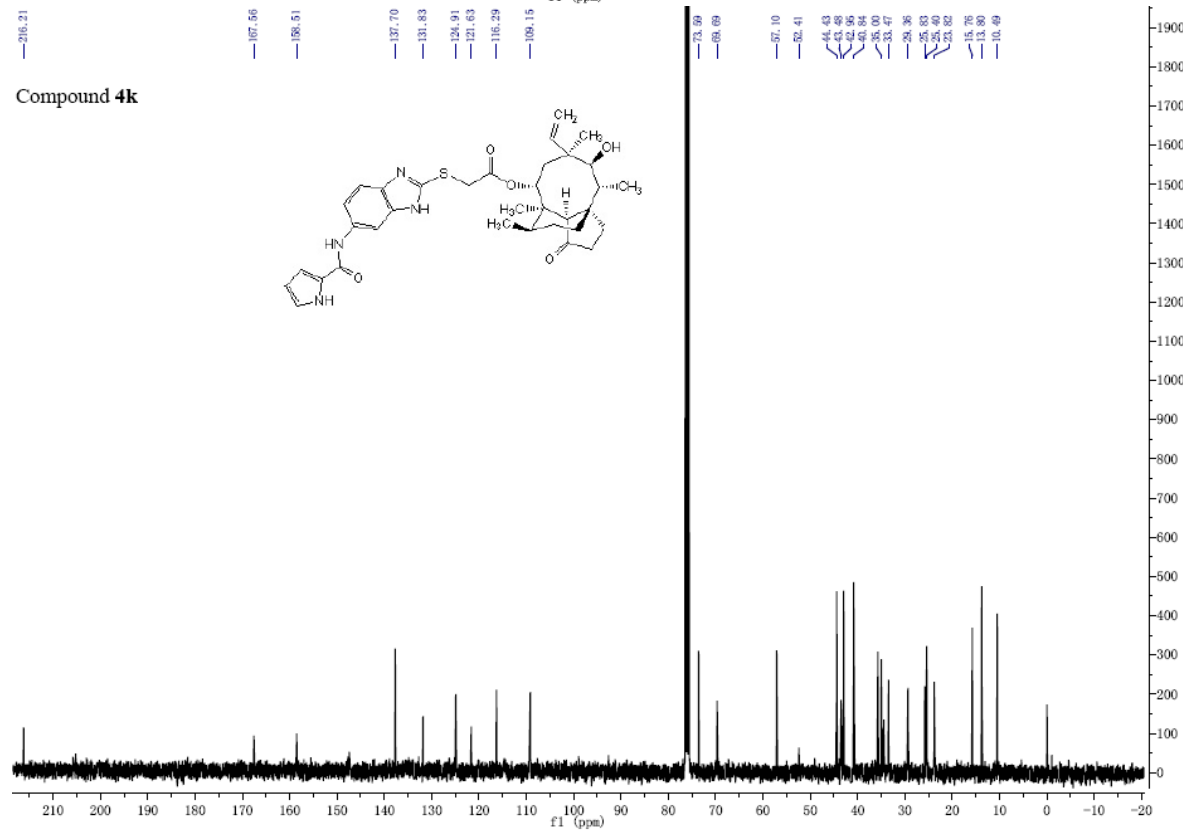

## Compound 41

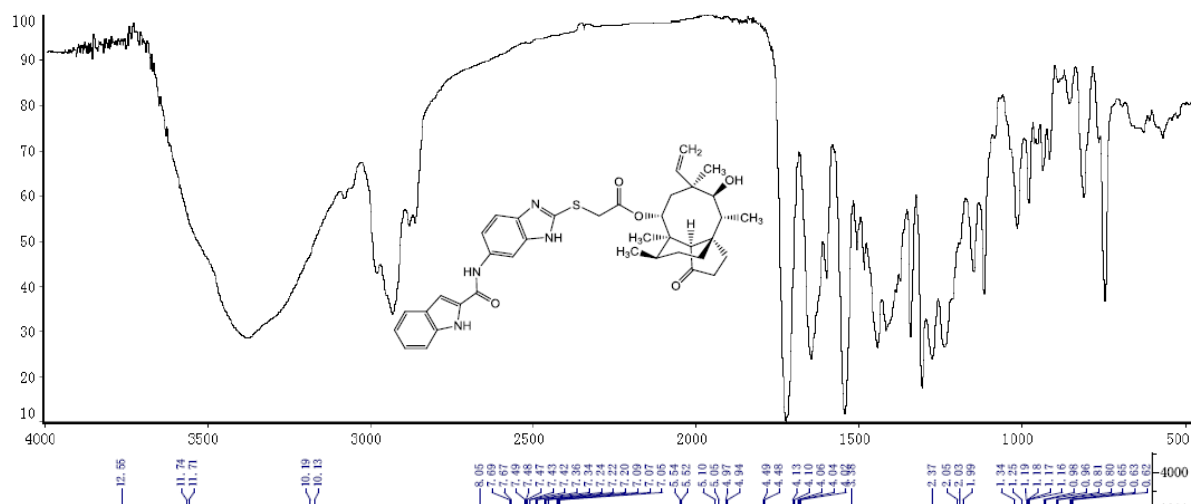

## Compound 41

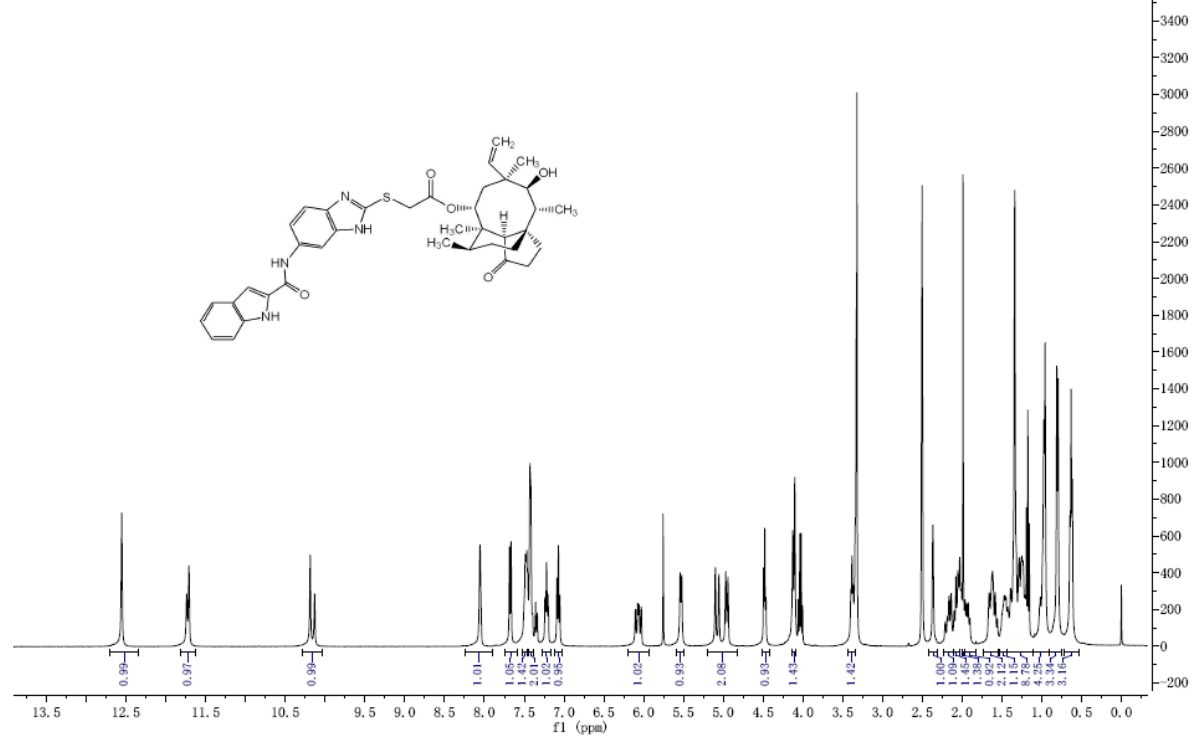

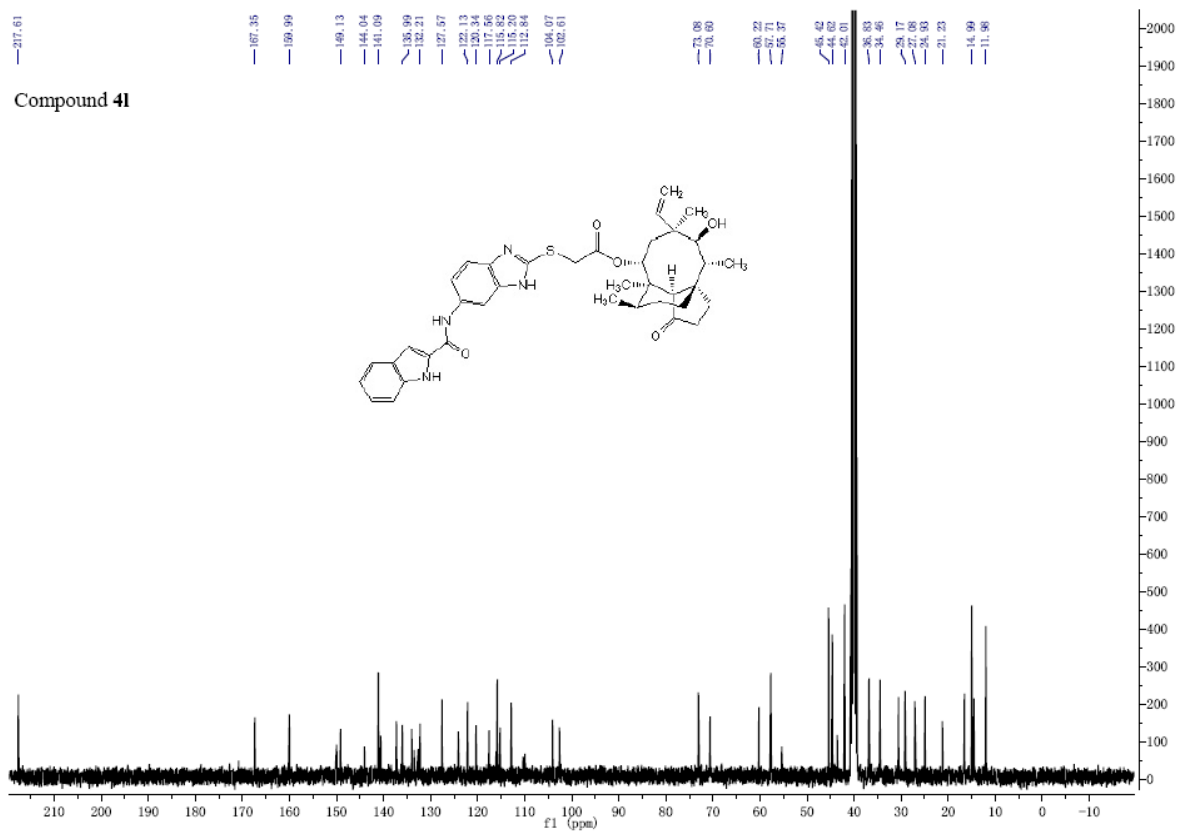

Supplement: s1 [file s1]
